# Supplementary material for: A Novel Protocol for Model Calibration in Biological Wastewater Treatment
Source: PubMed Central journal article supplement (PMC4329560; doi:10.1038/srep08493), 2015-02-16
Supplement: srep08493-s1.pdf [file srep08493-s1.pdf]

# Supporting Information

## **Title:**

### **A Novel Protocol for Model Calibration in Biological Wastewater Treatment**

## **Authors:**

Ao Zhu<sup>a,c</sup>, Jianhua Guo<sup>a,b,\*</sup>, Bing-Jie Ni<sup>b</sup>, Shuying Wang<sup>a</sup>, Qing Yang<sup>a</sup>, Yongzhen Peng<sup>a,\*</sup>

<sup>a</sup>*Key Laboratory of Beijing for Water Quality Science and Water Environmental Recovery Engineering, Engineering Research Center of Beijing, Beijing University of Technology, Beijing 100124, PR China*

<sup>b</sup>Advanced Water Management Centre (AWMC), The University of Queensland, St Lucia, Brisbane, QLD 4072, Australia

<sup>c</sup>Tsinghua Holding Human Settlements Environment Institute, *Beijing 100083, PR China*

\*Corresponding authors:

Jianhua Guo, Phone: +86-10-67392627; fax: +86-10-67392627; e-mail: [gjh@bjut.edu.cn](mailto:gjh@bjut.edu.cn).

Yongzhen Peng, Phone: +86-10-67392627; fax: +86-10-67392627; e-mail: [pyz@bjut.edu.cn](mailto:pyz@bjut.edu.cn)

## **Contents:**

Table S1. Characterizations explanations of the symbols.

Table S2. Summary of the process rates equations for related processes.

Table S3. Stoichiometric matrix for the extended processes and selected compounds.

Table S4. Kinetic and stoichiometric parameters at 20 °C.

**Table S1. Characterizations explanations of the symbols.**

| Symbol               | Characterization                                                                                                                |
|----------------------|---------------------------------------------------------------------------------------------------------------------------------|
| $x$                  | State variables of the Ordinary Differential Equations(ODEs)                                                                    |
| $u$                  | Input variables of the ODEs                                                                                                     |
| $y$                  | Outputs of the ODEs , such as $[COD S_{NH4} S_{NO2} S_{NO3}]^T$ , $y^s$ the simulation ones and $y^o$ the observed measurements |
| $\theta$             | Parameter set of the ODEs                                                                                                       |
| $\omega$             | the square noise variance matrix, whose inverse form $\omega^{-1}$ acts as the weights                                          |
| $E(\theta)$          | Objective function of the parameter estimation                                                                                  |
| $y_i, N_y$           | the $i$ -th state variable or output, the number of outputs                                                                     |
| $\theta_j, N_\theta$ | the $j$ -th parameter in the parameter set, the number of parameters                                                            |
| $t_k, N_t$           | the $k$ -th measuring time, the number of measuring times                                                                       |
| $\bar{S}$            | the local relative time varying sensitivity matrix at parameter point $\hat{\theta}$                                            |
| $\bar{M}$            | the global relative time varying sensitivity matrix over the bounds-defined parameter space                                     |
| <b>FIM</b>           | the local Fisher Information Matrix                                                                                             |
| $C$                  | the local covariance matrix derived from the <b>FIM</b>                                                                         |
| $\bar{C}$            | the pseudo-global covariance matrix, derived from $C$ and $E(\theta)$                                                           |
| $R$                  | the pseudo-global correlation matrix, derived from $\bar{C}$                                                                    |

Table S2. Summary of the process rates equations for related processes.

|                         | j  | Process                                                | Modified process rate equation                                                                                                                                                                                                        |
|-------------------------|----|--------------------------------------------------------|---------------------------------------------------------------------------------------------------------------------------------------------------------------------------------------------------------------------------------------|
| Heterotrophic organisms | 1  | p1 Hydrolysis                                          | $k_H \frac{X_S / X_H}{K_X + X_S / X_H} X_H$                                                                                                                                                                                           |
|                         | 2  | p2 Aerobic Storage of $S_S$                            | $k_{STO} \frac{S_O}{K_{H,O_2} + S_O} \frac{S_S}{K_{H,SS} + S_S} X_H$                                                                                                                                                                  |
|                         | 3  | p3(a) Anoxic Storage of $S_S$ $NO_3$ - $NO_2$          | $k_{STO} \eta_{H,NO_3} \frac{K_{H,O_2inh}}{K_{H,O_2inh} + S_O} \frac{S_S}{K_{H,SS} + S_S} \frac{S_{NO_3}}{K_{H,NO_3} + S_{NO_3}} X_H$                                                                                                 |
|                         | 4  | p3(b) Anoxic Storage of $S_S$ $NO_2$ - $N_2$           | $k_{STO} \eta_{H,NO_2} \frac{K_{H,O_2inh}}{K_{H,O_2inh} + S_O} \frac{S_S}{K_{H,SS} + S_S} \frac{S_{NO_2}}{K_{H,NO_2} + S_{NO_2}} X_H$                                                                                                 |
|                         | 5  | p4 Aerobic Growth of $X_H$                             | $\mu_H \frac{S_O}{K_{H,O_2} + S_O} \frac{S_{NH_4}}{K_{H,NH_4} + S_{NH_4}} \frac{S_{ALK}}{K_{H,ALK} + S_{ALK}} \frac{X_{STO} / X_H}{K_{H,STO} + X_{STO} / X_H} X_H$                                                                    |
|                         | 6  | p5(a) Anoxic Growth of $X_H$ $NO_3$ - $NO_2$           | $\mu_H \eta_{H,NO_3} \frac{K_{H,O_2inh}}{K_{H,O_2inh} + S_O} \frac{S_{NH_4}}{K_{H,NH_4} + S_{NH_4}} \frac{S_{ALK}}{K_{H,ALK} + S_{ALK}} \frac{X_{STO} / X_H}{K_{H,STO} + X_{STO} / X_H} \frac{S_{NO_3}}{K_{H,O_2inh} + S_{NO_3}} X_H$ |
|                         | 7  | p5(b) Anoxic Growth of $X_H$ $NO_2$ - $N_2$            | $\mu_H \eta_{H,NO_2} \frac{K_{H,O_2inh}}{K_{H,O_2inh} + S_O} \frac{S_{NH_4}}{K_{H,NH_4} + S_{NH_4}} \frac{S_{ALK}}{K_{H,ALK} + S_{ALK}} \frac{X_{STO} / X_H}{K_{H,STO} + X_{STO} / X_H} \frac{S_{NO_2}}{K_{H,O_2inh} + S_{NO_2}} X_H$ |
|                         | 8  | p6 Aerobic Endog. Resp. of $X_H$                       | $b_{H,O_2} \frac{S_O}{K_{H,O_2} + S_O} X_H$                                                                                                                                                                                           |
|                         | 9  | p7(a) Anoxic Endog. Resp. of $X_H$ $NO_3$ - $NO_2$     | $b_{H,O_2} \eta_{H,endNO_3} \frac{K_{H,O_2inh}}{K_{H,O_2inh} + S_O} \frac{S_{NO_3}}{K_{H,NO_3} + S_{NO_3}} X_H$                                                                                                                       |
|                         | 10 | p7(b) Anoxic Endog. Resp. of $X_H$ $NO_2$ - $N_2$      | $b_{H,O_2} \eta_{H,endNO_2} \frac{K_{H,O_2inh}}{K_{H,O_2inh} + S_O} \frac{S_{NO_2}}{K_{H,NO_2} + S_{NO_2}} X_H$                                                                                                                       |
|                         | 11 | p8 Aerobic Endog. Resp. of $X_{STO}$                   | $b_{STO,O_2} \frac{S_O}{K_{H,O_2} + S_O} X_{STO}$                                                                                                                                                                                     |
|                         | 12 | p9(a) Anoxic Endog. Resp. of $X_{STO}$ $NO_3$ - $NO_2$ | $b_{STO,O_2} \eta_{H,endNO_3} \frac{K_{H,O_2inh}}{K_{H,O_2inh} + S_O} \frac{S_{NO_3}}{K_{H,NO_3} + S_{NO_3}} X_{STO}$                                                                                                                 |
|                         | 13 | p9(b) Anoxic Endog. Resp. of $X_{STO}$ $NO_2$ - $N_2$  | $b_{STO,O_2} \eta_{H,endNO_2} \frac{K_{H,O_2inh}}{K_{H,O_2inh} + S_O} \frac{S_{NO_2}}{K_{H,NO_2} + S_{NO_2}} X_{STO}$                                                                                                                 |
| AOB                     | 14 | p10(a) Aerobic Growth of $X_{AOB}$ , Nitritation       | $\mu_{AOB} \frac{S_O}{K_{AOB,O_2} + S_O} \frac{S_{NH_4}}{K_{AOB,NH_4} + S_{NH_4}} \frac{S_{ALK}}{K_{N,ALK} + S_{ALK}} X_{AOB}$                                                                                                        |
|                         | 15 | p11(a) Aerobic End. Resp. of $X_{AOB}$                 | $b_{AOB} \frac{S_O}{K_{H,O_2} + S_O} X_{AOB}$                                                                                                                                                                                         |
|                         | 16 | p12(a) Anoxic End. Resp. of $X_{AOB}$                  | $b_{AOB} \eta_{N,end} \frac{K_{H,O_2inh}}{K_{H,O_2inh} + S_O} \frac{S_{NO_3}}{K_{H,NO_3} + S_{NO_3}} X_{AOB}$                                                                                                                         |
| NOB                     | 17 | p10(b) Aerobic Growth of $X_{NOB}$ , Nitratation       | $\mu_{NOB} \frac{S_O}{K_{NOB,O_2} + S_O} \frac{S_{NH_4}}{K_{H,NH_4} + S_{NH_4}} \frac{S_{NO_2}}{K_{NOB,NO_2} + S_{NO_2}} \frac{S_{ALK}}{K_{N,ALK} + S_{ALK}} X_{NOB}$                                                                 |
|                         | 18 | p11(b) Aerobic End. Resp. of $X_{NOB}$                 | $b_{NOB} \frac{S_O}{K_{H,O_2} + S_O} X_{NOB}$                                                                                                                                                                                         |
|                         | 19 | p12(b) Anoxic End. Resp. of $X_{NOB}$                  | $b_{NOB} \eta_{N,end} \frac{K_{H,O_2inh}}{K_{H,O_2inh} + S_O} \frac{S_{NO_3}}{K_{H,NO_3} + S_{NO_3}} X_{NOB}$                                                                                                                         |
|                         | 20 | Aeration                                               | $e^{0.024(T-20)} \cdot K_L a_{-20} \cdot (S_{O,SAT} - S_O)$                                                                                                                                                                           |

**Table S3. Stoichiometric matrix for the extended processes and selected compounds.**

| j  | Process                                                                           | S <sub>O</sub>                    | S <sub>S</sub> | S <sub>NH</sub>                     | S <sub>NO2</sub>                              | S <sub>NO3</sub>                              | S <sub>N2</sub>                              | S <sub>ALK</sub>                                                          | S <sub>I</sub> | X <sub>I</sub> | X <sub>H</sub> | X <sub>S</sub> | X <sub>STO</sub> | X <sub>AOB</sub> | X <sub>NOB</sub> |
|----|-----------------------------------------------------------------------------------|-----------------------------------|----------------|-------------------------------------|-----------------------------------------------|-----------------------------------------------|----------------------------------------------|---------------------------------------------------------------------------|----------------|----------------|----------------|----------------|------------------|------------------|------------------|
| 1  | p1 Hydrolysis                                                                     | 0                                 | $1-f_{SI}$     | 0                                   | 0                                             | 0                                             | 0                                            | $\frac{i_{N,SS} - f_{SI} \cdot i_{N,SI} - (1-f_{SI}) \cdot i_{N,SS}}{14}$ | $f_{SI}$       | 0              | 0              | -1             | 0                | 0                | 0                |
| 2  | p2 Aerobic Storage of S <sub>S</sub>                                              | $Y_{STO,O_2} - 1$                 | -1             | $i_{N,SS}$                          | 0                                             | 0                                             | 0                                            | $\frac{i_{N,SS}}{14}$                                                     | 0              | 0              | 0              | 0              | $Y_{STO,O_2}$    | 0                | 0                |
| 3  | p3(a) Anoxic Storage of S <sub>S</sub><br>NO <sub>3</sub> -NO <sub>2</sub>        | 0                                 | -1             | $i_{N,SS}$                          | $\frac{1-Y_{STO,NO_3}}{1.14}$                 | $-\frac{1-Y_{STO,NO_3}}{1.14}$                | 0                                            | $\frac{i_{N,SS}}{14}$                                                     | 0              | 0              | 0              | 0              | $Y_{STO,NO_3}$   | 0                | 0                |
| 4  | p3(b) Anoxic Storage of S <sub>S</sub><br>NO <sub>2</sub> -N <sub>2</sub>         | 0                                 | -1             | $i_{N,SS}$                          | $-\frac{1-Y_{STO,NO_2}}{1.72}$                | 0                                             | $\frac{1-Y_{STO,NO_2}}{1.72}$                | $\frac{i_{N,SS} - (Y_{STO,NO_2} - 1)/1.72}{14}$                           | 0              | 0              | 0              | 0              | $Y_{STO,NO_2}$   | 0                | 0                |
| 5  | p4 Aerobic Growth of X <sub>H</sub>                                               | $1-1/Y_{H,O_2}$                   | 0              | $-i_{N,BM}$                         | 0                                             | 0                                             | 0                                            | $-\frac{i_{N,BM}}{14}$                                                    | 0              | 0              | 1              | 0              | $-1/Y_{H,O_2}$   | 0                | 0                |
| 6  | p5(a) Anoxic Growth of X <sub>H</sub><br>NO <sub>3</sub> -NO <sub>2</sub>         | 0                                 | 0              | $-i_{N,BM}$                         | $\frac{1-Y_{H,NO_3}}{1.14 \cdot Y_{H,NO_3}}$  | $-\frac{1-Y_{H,NO_3}}{1.14 \cdot Y_{H,NO_3}}$ | 0                                            | $-\frac{i_{N,BM}}{14}$                                                    | 0              | 0              | 1              | 0              | $-1/Y_{H,NO_3}$  | 0                | 0                |
| 7  | p5(b) Anoxic Growth of X <sub>H</sub><br>NO <sub>2</sub> -N <sub>2</sub>          | 0                                 | 0              | $-i_{N,BM}$                         | $-\frac{1-Y_{H,NO_2}}{1.72 \cdot Y_{H,NO_2}}$ | 0                                             | $\frac{1-Y_{H,NO_2}}{1.72 \cdot Y_{H,NO_2}}$ | $\frac{(Y_{H,NO_2} - 1)/(1.72 \cdot Y_{H,NO_2}) - i_{N,BM}}{14}$          | 0              | 0              | 1              | 0              | $-1/Y_{H,NO_2}$  | 0                | 0                |
| 8  | p6 Aerobic Endog. Resp. of X <sub>H</sub>                                         | $-(1-f_{XI})$                     | 0              | $-f_{XI} \cdot i_{N,XI} + i_{N,BM}$ | 0                                             | 0                                             | 0                                            | $\frac{-f_{XI} \cdot i_{N,XI} + i_{N,BM}}{14}$                            | 0              | $f_{XI}$       | -1             | 0              | 0                | 0                | 0                |
| 9  | p7(a) Anoxic Endog. Resp. of X <sub>H</sub><br>NO <sub>3</sub> -NO <sub>2</sub>   | 0                                 | 0              | $-f_{XI} \cdot i_{N,XI} + i_{N,BM}$ | $\frac{1-f_{XI}}{1.14}$                       | $-\frac{1-f_{XI}}{1.14}$                      | 0                                            | $\frac{-f_{XI} \cdot i_{N,XI} + i_{N,BM}}{14}$                            | 0              | $f_{XI}$       | -1             | 0              | 0                | 0                | 0                |
| 10 | p7(b) Anoxic Endog. Resp. of X <sub>H</sub><br>NO <sub>2</sub> -N <sub>2</sub>    | 0                                 | 0              | $-f_{XI} \cdot i_{N,XI} + i_{N,BM}$ | $-\frac{1-f_{XI}}{1.72}$                      | 0                                             | $\frac{1-f_{XI}}{1.72}$                      | $\frac{i_{N,BM} - f_{XI} \cdot i_{N,XI} - (f_{XI} - 1)/1.72}{14}$         | 0              | $f_{XI}$       | -1             | 0              | 0                | 0                | 0                |
| 11 | p8 Aerobic Endog. Resp. of X <sub>STO</sub>                                       | -1                                | 0              | 0                                   | 0                                             | 0                                             | 0                                            | 0                                                                         | 0              | 0              | 0              | 0              | -1               | 0                | 0                |
| 12 | p9(a) Anoxic Endog. Resp. of X <sub>STO</sub><br>NO <sub>3</sub> -NO <sub>2</sub> | 0                                 | 0              | 0                                   | $\frac{1}{1.14}$                              | $-\frac{1}{1.14}$                             | 0                                            | 0                                                                         | 0              | 0              | 0              | 0              | -1               | 0                | 0                |
| 13 | p9(b) Anoxic Endog. Resp. of X <sub>STO</sub><br>NO <sub>2</sub> -N <sub>2</sub>  | 0                                 | 0              | 0                                   | $-\frac{1}{1.72}$                             | 0                                             | $\frac{1}{1.72}$                             | $\frac{1}{24.08}$                                                         | 0              | 0              | 0              | 0              | -1               | 0                | 0                |
| 14 | p10(a) Aerobic Growth of X <sub>AOB</sub> ,<br>Nitrification                      | $1 - \frac{48}{14 \cdot Y_{AOB}}$ | 0              | $-\frac{1}{Y_{AOB}} - i_{N,BM}$     | $\frac{1}{Y_{AOB}}$                           | 0                                             | 0                                            | $-\frac{1}{14} \left( \frac{2}{Y_{AOB}} + i_{N,BM} \right)$               | 0              | 0              | 0              | 0              | 0                | 1                | 0                |
| 15 | p11(a) Aerobic End. Resp. of X <sub>AOB</sub>                                     | $-(1-f_{XI})$                     | 0              | $-f_{XI} \cdot i_{N,XI} + i_{N,BM}$ | 0                                             | 0                                             | 0                                            | $\frac{-f_{XI} \cdot i_{N,XI} + i_{N,BM}}{14}$                            | 0              | $f_{XI}$       | 0              | 0              | 0                | -1               | 0                |
| 16 | p12(a) Anoxic End. Resp. of X <sub>AOB</sub>                                      | 0                                 | 0              | $-f_{XI} \cdot i_{N,XI} + i_{N,BM}$ | 0                                             | $-\frac{1-f_{XI}}{2.86}$                      | $\frac{1-f_{XI}}{2.86}$                      | $\frac{i_{N,BM} - f_{XI} \cdot i_{N,XI} - (f_{XI} - 1)/2.86}{14}$         | 0              | $f_{XI}$       | 0              | 0              | 0                | -1               | 0                |
| 17 | p10(b) Aerobic Growth of X <sub>NOB</sub> ,<br>Nitrification                      | $1 - \frac{16}{14 \cdot Y_{AOB}}$ | 0              | $-i_{N,BM}$                         | $-\frac{1}{Y_{NOB}}$                          | $\frac{1}{Y_{NOB}}$                           | 0                                            | $-\frac{i_{N,BM}}{14}$                                                    | 0              | 0              | 0              | 0              | 0                | 0                | 1                |
| 18 | p11(b) Aerobic End. Resp. of X <sub>NOB</sub>                                     | $-(1-f_{XI})$                     | 0              | $-f_{XI} \cdot i_{N,XI} + i_{N,BM}$ | 0                                             | 0                                             | 0                                            | $\frac{-f_{XI} \cdot i_{N,XI} + i_{N,BM}}{14}$                            | 0              | $f_{XI}$       | 0              | 0              | 0                | 0                | -1               |
| 19 | p12(b) Anoxic End. Resp. of X <sub>NOB</sub>                                      | 0                                 | 0              | $-f_{XI} \cdot i_{N,XI} + i_{N,BM}$ | 0                                             | $-\frac{1-f_{XI}}{2.86}$                      | $\frac{1-f_{XI}}{2.86}$                      | $\frac{i_{N,BM} - f_{XI} \cdot i_{N,XI} - (f_{XI} - 1)/2.86}{14}$         | 0              | $f_{XI}$       | 0              | 0              | 0                | 0                | -1               |

Table S4. Kinetic and stoichiometric parameters at 20 °C.

| Index | Symbol              | Characterization                                                           | Low   | Value | High | $\theta$ | Units                                                 | references |
|-------|---------------------|----------------------------------------------------------------------------|-------|-------|------|----------|-------------------------------------------------------|------------|
|       | $i_{N,SI}$          | N content of inert soluble COD $S_I$                                       | 0.005 | 0.01  | 0.01 |          | [g N/g COD]                                           | 1          |
| 1     | $i_{N,SS}$          | N content of readily biodegradable substrate                               | 0.01  | 0.03  | 0.05 |          | [g N/g COD]                                           | 1          |
| 2     | $i_{N,XI}$          | N content of inert particulate COD $X_I$                                   | 0.01  | 0.04  | 0.07 |          | [g N/g COD]                                           | 1          |
|       | $i_{N,XS}$          | N content of slowly biodegradable substrate                                | 0.01  | 0.03  | 0.05 |          | [g N/g COD]                                           | 1          |
| 3     | $i_{N,BM}$          | N content of biomass $X_H$ , $X_{AOB}$ , $X_{NOB}$                         | 0.03  | 0.07  | 0.11 |          | [g N/g COD]                                           | 1          |
|       | $f_{SI}$            | Production of $S_I$ in hydrolysis                                          | 0.00  | 0.00  | 0.02 |          | [g COD/g COD]                                         | 2          |
| 4     | $f_{XI}$            | Fraction of inert COD generated in biomass lysis                           | 0.1   | 0.2   | 0.3  |          | [g COD/g COD]                                         | 1          |
| 5     | $Y_{H,O_2}$         | Yield coeff. for heterotrophs in aerobic growth                            | 0.65  | 0.8   | 0.95 |          | [g COD/g COD]                                         | 1          |
| 6     | $Y_{H,NO_3}$        | Yield coeff. for heterotrophs in anoxic growth ( $NO_3^-$ -N- $NO_2^-$ -N) | 0.5   | 0.65  | 0.8  |          | [g COD/g COD]                                         | 1          |
| 7     | $Y_{H,NO_2}$        | Yield coeff. for heterotrophs in anoxic growth ( $NO_2^-$ -N- $N_2$ -N)    | 0.5   | 0.65  | 0.8  |          | [g COD/g COD]                                         | 1          |
| 8     | $Y_{STO,O_2}$       | Yield coeff. for $X_{STO}$ in aerobic growth                               | 0.2   | 0.8   | 1    |          | [g COD/g COD]                                         | 1          |
| 9     | $Y_{STO,NO_3}$      | Yield coeff. for $X_{STO}$ in anoxic growth ( $NO_3^-$ -N- $NO_2^-$ -N)    | 0.2   | 0.7   | 1    |          | [g COD/g COD]                                         | 1          |
| 10    | $Y_{STO,NO_2}$      | Yield coeff. for $X_{STO}$ in anoxic growth ( $NO_2^-$ -N- $N_2$ -N)       | 0.2   | 0.7   | 1    |          | [g COD/g COD]                                         | 1          |
| 11    | $Y_{AOB}$           | Yield coeff. for $X_{AOB}$                                                 | 0.1   | 0.18  | 0.3  |          | [g COD/g N]                                           | 3          |
| 12    | $Y_{NOB}$           | Yield coeff. for $X_{NOB}$                                                 | 0.02  | 0.06  | 0.1  |          | [g COD/g N]                                           | 3          |
| 13    | $k_H$               | Hydrolysis rate constant                                                   | 4     | 9     | 15   | 0.04     | [d <sup>-1</sup> ]                                    | 1          |
| 14    | $k_{STO}$           | Maximum storage rate                                                       | 4     | 12    | 20   | 0.07     | [d <sup>-1</sup> ]                                    | 1          |
| 15    | $\mu_H$             | Maximum growth rate on substrate of heterotrophs                           | 1     | 3     | 6    | 0.07     | [d <sup>-1</sup> ]                                    | 1          |
| 16    | $\mu_{AOB}$         | Maximum growth rate of $X_{AOB}$                                           | 0.8   | 0.9   | 1.1  | 0.12     | [d <sup>-1</sup> ]                                    | 3          |
| 17    | $\mu_{NOB}$         | Maximum growth rate of $X_{NOB}$                                           | 0.5   | 0.65  | 1.0  | 0.078    | [d <sup>-1</sup> ]                                    | 3          |
| 18    | $b_{H,O_2}$         | Aerobic end. resp. rate for $X_H$                                          | 0.1   | 0.3   | 0.5  | 0.07     | [d <sup>-1</sup> ]                                    | 1          |
| 19    | $b_{STO,O_2}$       | Aerobic end. resp. rate for $X_{STO}$                                      | 0.1   | 0.3   | 0.5  |          | [d <sup>-1</sup> ]                                    | 1          |
| 20    | $b_{AOB}$           | Decay rate of $X_{AOB}$                                                    | 0.05  | 0.15  | 0.25 | 0.12     | [d <sup>-1</sup> ]                                    | 4          |
| 21    | $b_{NOB}$           | Decay rate of $X_{NOB}$                                                    | 0.1   | 0.22  | 0.34 | 0.078    | [d <sup>-1</sup> ]                                    | 4          |
| 22    | $\eta_{H,NO_3}$     | Reduction factor for denitrification ( $NO_3^-$ -N- $NO_2^-$ -N)           | 0.1   |       | 1    |          | -                                                     | 3          |
| 23    | $\eta_{H,NO_2}$     | Reduction factor for denitrification ( $NO_2^-$ -N- $N_2$ -N)              | 0.1   |       | 1    |          | -                                                     | 3          |
| 24    | $\eta_{H,end,NO_3}$ | Reduction factor for $b_H$ , anoxic condition ( $NO_3^-$ -N- $NO_2^-$ -N)  | 0.25  |       | 1    |          | -                                                     | 3          |
| 25    | $\eta_{H,end,NO_2}$ | Reduction factor for $b_H$ , anoxic condition ( $NO_2^-$ -N- $N_2$ -N)     | 0.35  |       | 1    |          | -                                                     | 3          |
| 26    | $\eta_{N,end}$      | Reduction factor for $b_{AOB}$ and $b_{NOB}$ , anoxic condition            | 0.1   |       | 1    |          | -                                                     | 4          |
| 27    | $K_X$               | Hydrolysis saturation constant                                             | 0.2   | 1.0   | 2    |          | [g $X_S$ g <sup>-1</sup> $X_H$ ]                      | 1          |
| 28    | $K_{H,O_2}$         | Saturation coeff. for oxygen, het. growth                                  | 0.05  | 0.2   | 0.5  |          | [g O <sub>2</sub> m <sup>-3</sup> ]                   | 1          |
| 29    | $K_{H,O_2,inh}$     | Inhibition coeff. for oxygen, het. growth                                  | 0.05  | 0.2   | 5    |          | [g O <sub>2</sub> m <sup>-3</sup> ]                   | 1          |
| 30    | $K_{H,SS}$          | Saturation coeff. for readily biodegradable substrates, het. growth        | 5     | 10    | 20   |          | [g COD m <sup>-3</sup> ]                              | 1          |
| 31    | $K_{H,NH_4}$        | Saturation/inhibition coefficient for ammonium, het. growth                | 0.001 | 0.01  | 0.1  |          | [g N m <sup>-3</sup> ]                                | 1          |
| 32    | $K_{H,NO_3}$        | Saturation/inhibition coefficient for nitrate, het. growth                 | 0.1   | 0.5   | 10   |          | [g N m <sup>-3</sup> ]                                | 1          |
| 33    | $K_{H,NO_2}$        | Saturation/inhibition coefficient for nitrite, het. growth                 | 0.1   | 0.5   | 10   |          | [g N m <sup>-3</sup> ]                                | 1          |
| 34    | $K_{H,ALK}$         | Saturation/inhibition coefficient for alkalinity, het. growth              | 0.01  | 0.1   | 1    |          | [mole HCO <sub>3</sub> <sup>-</sup> m <sup>-3</sup> ] | 1          |
| 35    | $K_{H,STO}$         | Saturation coeff. for storage products                                     | 0.01  | 0.1   | 1    |          | [g COD m <sup>-3</sup> ]                              | 1          |
| 36    | $K_{AOB,O_2}$       | Saturation coefficient for oxygen, AOB                                     | 0.2   | 0.8   | 5    |          | [g O <sub>2</sub> m <sup>-3</sup> ]                   | 5          |
| 37    | $K_{NOB,O_2}$       | Saturation coefficient for oxygen, NOB                                     | 0.2   | 0.8   | 5    |          | [g O <sub>2</sub> m <sup>-3</sup> ]                   | 5          |
| 38    | $K_{AOB,NH_4}$      | Saturation coeff. for ammonium, AOB                                        | 0.05  | 0.14  | 0.5  |          | [g N m <sup>-3</sup> ]                                | 5          |
| 39    | $K_{NOB,NO_2}$      | Saturation coefficient for nitrite, NOB                                    | 0.05  | 0.28  | 0.5  |          | [g N m <sup>-3</sup> ]                                | 5          |
| 40    | $K_{N,ALK}$         | Saturation/inhibition coefficient for alkalinity, aut. growth              | 0.1   | 0.5   | 1    |          | [mole HCO <sub>3</sub> <sup>-</sup> m <sup>-3</sup> ] | 1          |

**References:**

1. Koch G, Kuhni M, Gujer W, Siegrist H. Calibration and Validation of Activated Sludge Model no. 3 for Swiss Municipal Wastewater. *Water Research* **34**, 3580-3590 (2000).
2. Gujer W, Henze M, Mino T, van Loosdrecht M. Activated sludge model No. 3. *Water Science and Technology* **39**, 183-193 (1999).
3. Kaelin D, Manser R, Rieger L, Eugster J, Rottermann K, Siegrist H. Extension of ASM3 for two-step nitrification and denitrification and its calibration and validation with batch tests and pilot scale data. *Water Research* **43**, 1680-1692 (2009).
4. Manser R, Gujer W, Siegrist H. Decay processes of nitrifying bacteria in biological wastewater treatment systems. *Water Research* **40**, 2416-2426 (2006).
5. Manser R, Gujer W, Siegrist H. Consequences of mass transfer effects on the kinetics of nitrifiers. *Water Research* **39**, 4633-4642 (2005).
